# Supplementary material
Source: PubMed Central journal article supplement (PMC2845428)

# Supplemental Figure 1

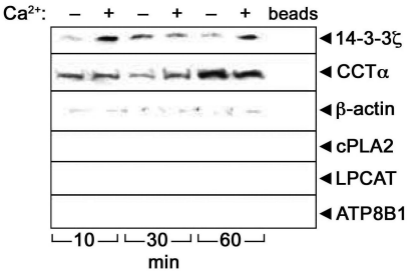

# Supplemental Figure 2

## A.

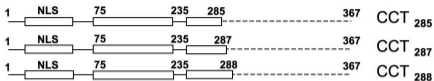

## B.

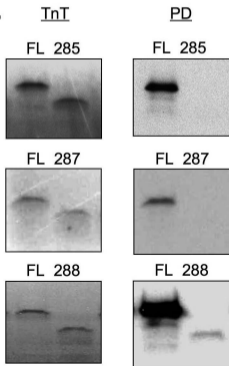

# Supplemental Figure 3

## A.

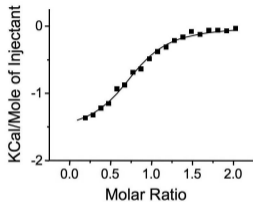

|                              |                  |                         |
|------------------------------|------------------|-------------------------|
| 14-3-3/S288                  |                  |                         |
| Chi <sup>2</sup> /DoF = 1293 |                  |                         |
| N                            | 0.773            | ±0.0178 Sites           |
| K                            | 1.17E6           | ±1.57E5 M <sup>-1</sup> |
| Kd                           | 850 nM           |                         |
| ΔH                           | -1569            | ±52.56 cal/mol          |
| ΔS                           | 22.5 cal/mol/deg |                         |

## B.

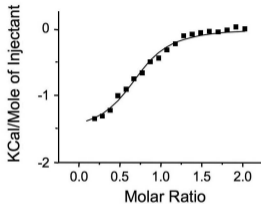

|                              |                  |                         |
|------------------------------|------------------|-------------------------|
| 14-3-3/S329                  |                  |                         |
| Chi <sup>2</sup> /DoF = 2342 |                  |                         |
| N                            | 0.712            | ±0.0228 Sites           |
| K                            | 1.35E6           | ±2.54E5 M <sup>-1</sup> |
| Kd                           | 740 nM           |                         |
| ΔH                           | -1539            | ±71.49 cal/mol          |
| ΔS                           | 22.9 cal/mol/deg |                         |

## C.

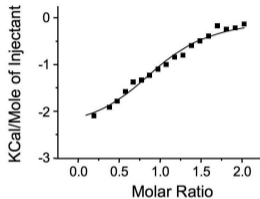

|                              |                  |                         |
|------------------------------|------------------|-------------------------|
| 14-3-3/S339                  |                  |                         |
| Chi <sup>2</sup> /DoF = 7240 |                  |                         |
| N                            | 0.999            | ±0.0409 Sites           |
| K                            | 6.63E5           | ±1.44E5 M <sup>-1</sup> |
| Kd                           | 1500 nM          |                         |
| ΔH                           | -2429            | ±154.8 cal/mol          |
| ΔS                           | 18.5 cal/mol/deg |                         |

# Supplemental Figure 4

Con

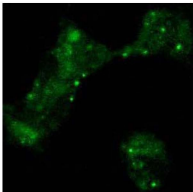

Ca<sup>2+</sup>

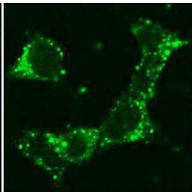

Inhibitor + Ca<sup>2+</sup>

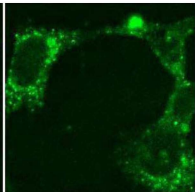

# Supplemental Figure 5

(-)

(+)

PA103

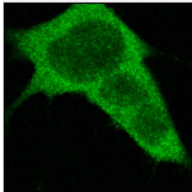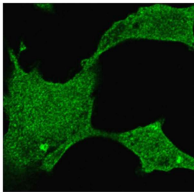

# Supplemental Figure 6

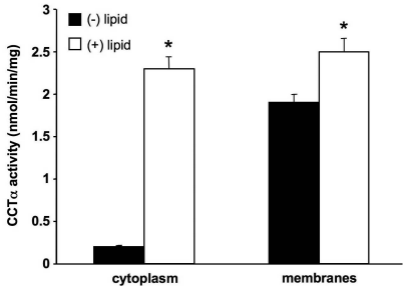

Supplement: fj.09-136044_1.pdf [file fj.09-136044_1.pdf]
